# Supplementary material
Source: publisher site journal article supplement (https://en-cdn.bio-protocol.org/attached/file/20180122/Supplemental%20file%201%20jobplot%20setup%20worksheet.xlsx)
Supplement: Supplementary file 1 [file Supplemental%20file%201%20jobplot%20setup%20worksheet.xlsx]

## Sheet: Sheet1
Protein1:Protein2 ratio	0:0	1:0	11:1	5:1	3:1	2:1	1.4:1	1:1	1:1.4	1:2	1:3	1:5	1:11	0:1
column nr	1	2	3	4	5	6	7	8	9	10	11	12	13	14
Protein1 (labeled or unlabeled)
Final conc (nM)	0	150	137.5	125	112.5	100	87.5	75	62.5	50	37.5	25	12.5	0
Stock concentration (nM)	500	500	500	500	500	500	500	500	500	500	500	500	500	500
Total reaction volume (ul)	20	20	20	20	20	20	20	20	20	20	20	20	20	20
Protein needed per reaction (ul)	0	12	11	10	9	8	7	6	5	4	3	2	1	0	note that here the protein concentration is TWICE the one needed in the final reaction
Buffer needed per reaction (ul)	20	8	9	10	11	12	13	14	15	16	17	18	19	20
No. of reactions	4	4	4	4	4	4	4	4	4	4	4	4	4	4
Total Protein (ul)	0	60	55	50	45	40	35	30	25	20	15	10	5	0	these are corrected for void volumes during pipetting
Total Buffer (ul)	100	40	45	50	55	60	65	70	75	80	85	90	95	100
Protein2 (labeled or unlabeled)
Final conc (nM)	0	0	12.5	25	37.5	50	62.5	75	87.5	100	112.5	125	137.5	150
Stock conc (nM)	1000	1000	1000	1000	1000	1000	1000	1000	1000	1000	1000	1000	1000	1000
Total reaction vol (ul)	20	20	20	20	20	20	20	20	20	20	20	20	20	20
Protein needed per reaction (ul)	0	0	0.5	1	1.5	2	2.5	3	3.5	4	4.5	5	5.5	6	note that here the protein concentration is TWICE the one needed in the final reaction
Buffer needed per reaction (ul)	20	20	19.5	19	18.5	18	17.5	17	16.5	16	15.5	15	14.5	14
No. of reactions	4	4	4	4	4	4	4	4	4	4	4	4	4	4
Total Protein (ul)	0	0	2.5	5	7.5	10	12.5	15	17.5	20	22.5	25	27.5	30	these are corrected for void volumes during pipetting
Total Buffer (ul)	100	100	97.5	95	92.5	90	87.5	85	82.5	80	77.5	75	72.5	70
